# Supplementary material
Source: PubMed Central journal article supplement (PMC2850258)
Supplement: NIHMS172807-supplement-Supp1.pdf [file NIHMS172807-supplement-Supp1.pdf]

## **Supplement Material**

### **Bioinformatic Analysis of Gene Sets Regulated by Ligand-Activated and Dominant-Negative PPAR $\gamma$ in Mouse Aorta**

Henry L. Keen<sup>1</sup>, Carmen M. Halabi<sup>2</sup>, Andreas M. Beyer<sup>2</sup>, Willem J. de Lange<sup>1</sup>, Xuebo Liu<sup>1</sup>, Nobuyo Maeda<sup>9</sup>, Frank M. Faraci<sup>1,5</sup>, Thomas L. Casavant<sup>6,7,8</sup> and Curt D. Sigmund<sup>1,3,4</sup>

## Supplemental Methods

### *Analysis of Gene Expression Microarray Datasets:*

The microarrays datasets used in the present manuscript are listed below. The top two datasets were generated in the Sigmund laboratory; the others were downloaded from publicly available repositories including NCBI's Gene Expression Omnibus (GEO, <http://ncbi.nih.gov/geo>) and EBI's Array Express (<http://www.ebi.ac.uk/microarray-as/ae/>).

| <b>Analysis Description</b>                | <b>Tissue</b>  | <b>Samples</b>                                                        | <b>Array Platform</b> | <b>Array Accession</b>  | <b>Analysis Method</b>         |
|--------------------------------------------|----------------|-----------------------------------------------------------------------|-----------------------|-------------------------|--------------------------------|
| Rosiglitazone treatment of mice            | Thoracic aorta | control (n=3), low2d (n=3), low14d (n=3), high2d (n=3), high14d (n=2) | GPL1261               | GSE8949                 | RMA-Limma                      |
| Dominant negative P465L PPAR $\gamma$ mice | Thoracic aorta | control (n=3), dominant negative (n=3)                                | GPL1261               | GSE8949                 | RMA-Limma                      |
| Rosiglitazone treatment of 3T3L1 cells     | 3T3-L1 cells   | control (n=3), rosiglitazone (n=3)                                    | GPL81                 | GSE1458                 | MAS5 P/A calls and fold change |
| Genes expressed in 3T3-L1 cells            | 3T3-L1 cells   | control (n=7)                                                         | GPL1261               | GSE14004, GSE8682       | MAS5 P/A calls                 |
| Correlation across multiple human tissues  | Various        | total hybridizations (n=53)                                           | GPL570                | Affymetrix-no accession | RMA-Pearson correlation        |

All of the above datasets were generated using commercially-available Affymetrix microarray platforms. Mapping of probe set identifiers to gene specific information (e.g., official gene symbol, gene description) was performed using microarray annotation files available from Affymetrix (<http://www.affymetrix.com>). Annotation files (CSV format) were converted into plain text, parsed and imported into customized MySQL (<http://www.mysql.com/>) databases. For the datasets generated in our laboratory, the data was analyzed using R statistical software (<http://www.r-project.org/>) and downloaded packages from the associated Bioconductor project (<http://www.bioconductor.org>). The raw microarray data (i.e., the \*.CEL files) was imported into R and normalized using Robust Multi-array Average (RMA).<sup>1</sup> The quality of the array hybridizations was confirmed by utilizing the array quality control (QC) functions in Bioconductor.

Differential expression of genes between groups and their corresponding genetically matched or vehicle treated controls was determined using the Linear Models for Microarray Analysis (limma) package. The adjusted p-value representing statistical significance was determined by analysis of the Affymetrix control probes as described by Smyth.<sup>2</sup>

For the 3T3-L1 adipocyte datasets (GSE1458, GSE14004, and GSE8682), the Affymetrix Microarray Array Suite version 5 algorithm (MAS5) generated signal values and present/absent (P/A) calls were extracted from the publicly available series files. The dataset used to compare gene expression patterns across multiple diverse human tissue samples was downloaded from ([http://www.affymetrix.com/support/technical/sample\\_data/exon\\_array\\_data.affx](http://www.affymetrix.com/support/technical/sample_data/exon_array_data.affx)), and analyzed using Affymetrix Power Tools (APT). Using APT default parameters, RMA was used for normalization of the raw data and generation of signal values. The human tissues included in this dataset include breast, cerebellum, heart, kidney, liver, muscle, pancreas, prostate, spleen, testes, and thyroid. Pearson's correlation coefficient (r), computed using customized software written in the Perl programming language (version 5.8.8 for Windows), was used to assess similarity of expression patterns between different genes.

#### *Gene Set Enrichment Analysis*

Determination of whether expression of a set of genes, as a group, was statistically changed was accomplished using the JAVA-based command line version of the Gene Set Enrichment Analysis tool (GSEA, <http://www.broad.mit.edu/gsea/>).<sup>3</sup> For GSEA, the number of gene set permutations was set at 1000, and a p-value less than 0.05 was considered statistically significant. This p-value is the GSEA nominal p-value. This is a permutation derived p-value and does not take into account multiple hypothesis testing. To address multiple testing, we used the R package q-value to calculate a false discovery rate (FDR).<sup>4</sup> For a

nominal p-value of 0.05, the estimated FDR was 0.17, which is in line with the threshold (FDR < 0.25) previously suggested for gene set analysis.<sup>3</sup> Also, it should be noted, that for most of our comparisons, we are querying for gene sets that are significantly enriched at a p-value less than 0.05 in multiple datasets (e.g., 4 rosiglitazone treatment groups). The gene sets used in the manuscript and their sources are listed below.

| <b>Gene set description</b>                 | <b>Number Sets</b> | <b>Source</b>                                                                                       |
|---------------------------------------------|--------------------|-----------------------------------------------------------------------------------------------------|
| Known PPAR $\gamma$ targets                 | 1                  | compiled from published literature<br>( <a href="http://www.pubmed.gov">http://www.pubmed.gov</a> ) |
| UniProt Knowledgebase                       | 443                | <a href="http://www.uniprot.org/">http://www.uniprot.org/</a>                                       |
| Gene Ontology                               | 2014               | <a href="http://www.geneontology.org">http://www.geneontology.org</a>                               |
| Rosiglitazone induced genes in 3T3-L1 cells | 6                  | GSE1458                                                                                             |

The set of known PPAR $\gamma$  target genes was assembled from the literature as follows. We initially searched the NCBI Pubmed database using the keywords “PPRE” and “PPAR gamma”. Inclusion criteria was evidence of at least two of the following 1) up-regulation of endogenous gene expression with thiazolidinedione (TZD) treatment, 2) PPAR $\gamma$  mediated activation of promoter-reporter constructs in transient transfection assays, 3) binding of PPAR $\gamma$  protein to gene promoter in chromatin immunoprecipitation assay (ChIP), or 4) binding of PPAR $\gamma$  to identified PPAR response element (PPRE) in electromobility shift assay (EMSA). During our search, we identified a previously compiled list of PPREs from Lemay et al.<sup>1</sup> Most of the target genes from that study met our criteria and were included in our final list.

#### *Computational search for PPAR response elements:*

Genomic sequence (5 kb upstream of the transcriptional start site) from the reference sequence (refseq) database was downloaded from UCSC (<http://genome.ucsc.edu>) for mouse (March 2005 release, mm6, 18176 sequences). We used a list of experimentally verified PPAR response elements (PPREs) compiled previously to form a position weight matrix.<sup>5</sup> This matrix described the normal sequence variability occurring in PPREs and was used to score potential matches to query sequences. Query sequences achieving a score of 80% of the maximum score, where the maximum score is that derived from the consensus sequence, were considered to be PPREs. This search was implemented using custom software written in Perl. The exact genomic location of each PPRE was determined to ensure that the same PPRE was not counted multiple times.

#### *Analysis of PPAR $\gamma$ binding sites identified in 3T3-L1 adipocytes*

In addition to the computational strategy described above, we used a publicly available dataset (Table 1 of Supplemental Materials for manuscript referenced below) mapping the location of PPAR $\gamma$  binding sites in 3T3-L1 adipocytes on the basis of function (chromatin immunoprecipitation and microarray hybridization, ChIP-chip) not computational prediction.<sup>6</sup> A total of 5299 genomic regions binding PPAR $\gamma$  were identified. Independent ChIP assays using quantitative PCR and custom microarrays demonstrated that the false discovery rate for this ChIP-chip experiment was low (3-4%). To merge datasets, we limited our analysis to those genes that were consistently expressed in both aorta and 3T3-L1 adipocytes (3T3-L1 expression data, NCBI GEO Accession Numbers GSE14004 and GSE8682). Mapping of PPAR $\gamma$  binding sites relative to gene location was accomplished using the refLink and refGene tables (assembly mm8) from UCSC (<http://genome.ucsc.edu>). The p-value for enrichment was determined using Fisher's exact test (one-sided) comparing the proportion of genes with an associated PPRE compared to the proportion in the baseline

group (i.e., all genes expressed in 3T3-L1 cells and aorta). Fisher's test was performed using the R statistical package.

#### *Other Informatics:*

Functional categorization of genes including mapping to Gene Ontology (GO) terms and statistical tests of term enrichment (modified Fisher's Exact test) was performed using the Database for Annotation, Visualization, and Integrated Discovery (DAVID, <http://david.abcc.ncifcrf.gov/>) available at the NIH.<sup>7</sup>

#### **References**

- (1) Lemay DG, Hwang DH. Genome-wide identification of peroxisome proliferator response elements using integrated computational genomics. *J.Lipid Res.* 2006;47:1583-1587.
- (2) Smyth GK. Limma: Linear models for microarray data. In: Gentleman RC, Carey VJ, Dudoit S, Irizarry R, Huber W, editors. *Bioinformatics and Computational Biology Solutions using R and Bioconductor*. New York: Springer; 2005. p. 397-420.
- (3) Subramanian A, Tamayo P, Mootha VK, Mukherjee S, Ebert BL, Gillette MA, Paulovich A, Pomeroy SL, Golub TR, Lander ES, Mesirov JP. Gene set enrichment analysis: a knowledge-based approach for interpreting genome-wide expression profiles. *Proc.Natl.Acad.Sci.U.S.A.* 2005;102:15545-15550.
- (4) Storey JD, Tibshirani R. Statistical significance for genomewide studies. *Proc.Natl.Acad.Sci.U.S.A.* 2003;100:9440-9445.
- (5) Keen HL, Ryan MJ, Beyer A, Mathur S, Scheetz TE, Gackle BD, Faraci FM, Casavant TL, Sigmund CD. Gene expression profiling of potential PPAR $\gamma$  target genes in mouse aorta. *Physiological Genomics.* 2004;18:33-42.
- (6) Lefterova MI, Zhang Y, Steger DJ, Schupp M, Schug J, Cristancho A, Feng D, Zhuo D, Stoeckert CJ, Jr., Liu XS, Lazar MA. PPAR $\gamma$  and C/EBP factors orchestrate adipocyte biology via adjacent binding on a genome-wide scale. *Genes Dev.* 2008;22:2941-2952.
- (7) Huang dW, Sherman BT, Tan Q, Kir J, Liu D, Bryant D, Guo Y, Stephens R, Baseler MW, Lane HC, Lempicki RA. DAVID Bioinformatics Resources: expanded annotation database and novel algorithms to better extract biology from large gene lists. *Nucleic Acids Res.* 2007;35:W169-W175.

## Supplemental Figures

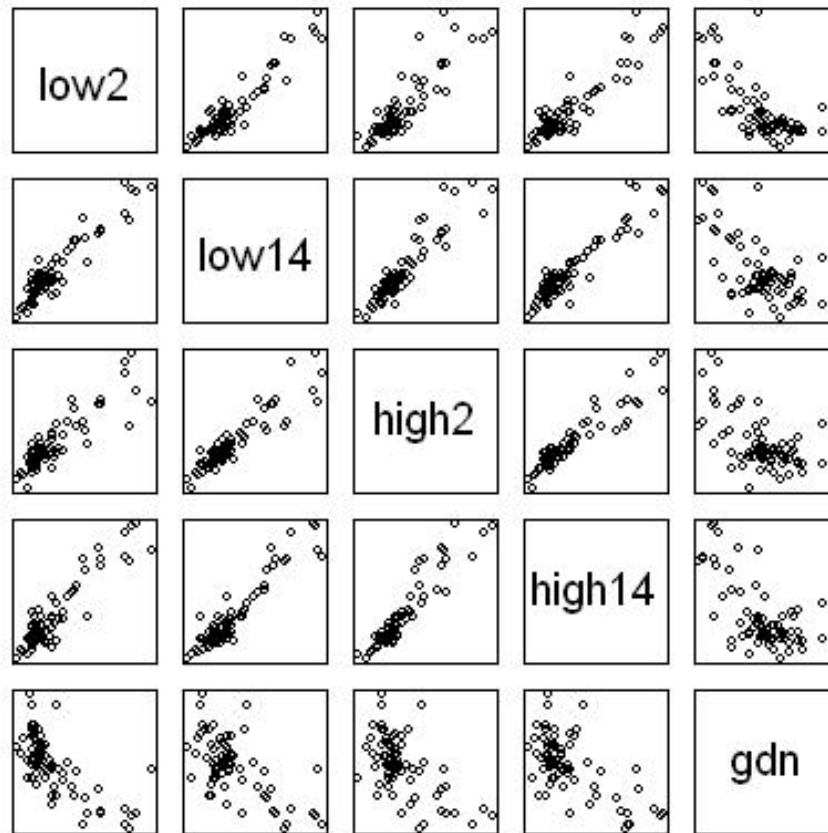

Figure S1. Multiple scatterplots of fold-changes in expression of known PPAR $\gamma$  target genes (Supplemental Table 1) relative to the appropriate control group. All pairwise comparisons are displayed. Mice received rosiglitazone at either a low (3 mg/kg/day) or high (10 mg/kg/day) dose for either 2 or 14 d. For comparisons between different rosiglitazone treatment groups there is a strong positive correlation ( $r > 0.9$ ), whereas there is an inverse or negative correlation ( $r < -0.6$ ) between the rosiglitazone and dominant negative PPAR $\gamma$  group (g-dn).

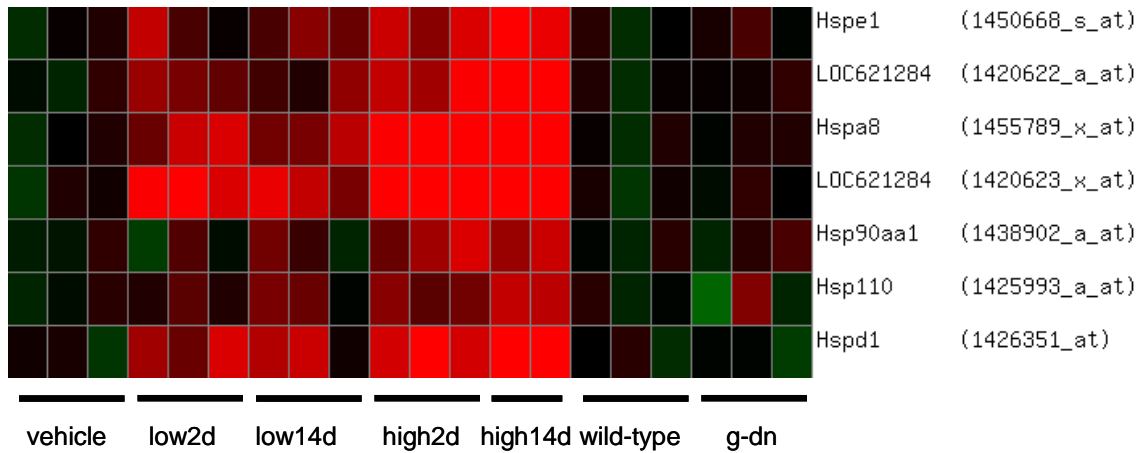

**Figure S2.** Heat shock proteins displaying rosiglitazone specific activation. All gene expression values have been log<sub>2</sub> transformed and normalized to the appropriate control group. Wild-type littermates serve as control for the gene-targeted mice containing a dominant negative isoform of PPAR $\gamma$  (g-dn). Vehicle-treated mice are the control for mice receiving rosiglitazone, a high affinity ligand of PPAR $\gamma$ . Mice received rosiglitazone at either a low (3 mg/kg/day) or high (10 mg/kg/day) dose for either 2 or 14 d. Each column represents a sample, and each row represents a gene. Increasing intensity of red or green color indicates greater up- or down- regulation, respectively, relative to the appropriate control group. Black indicates no change in expression. The genes displayed in this heatmap map to the gene ontology category heat shock protein activity (GO:0003773), were up-regulated by rosiglitazone treatment (significant in at least one experimental group) and did not change (lack of significance and less than 10% change from control group) in the g-dn mice.



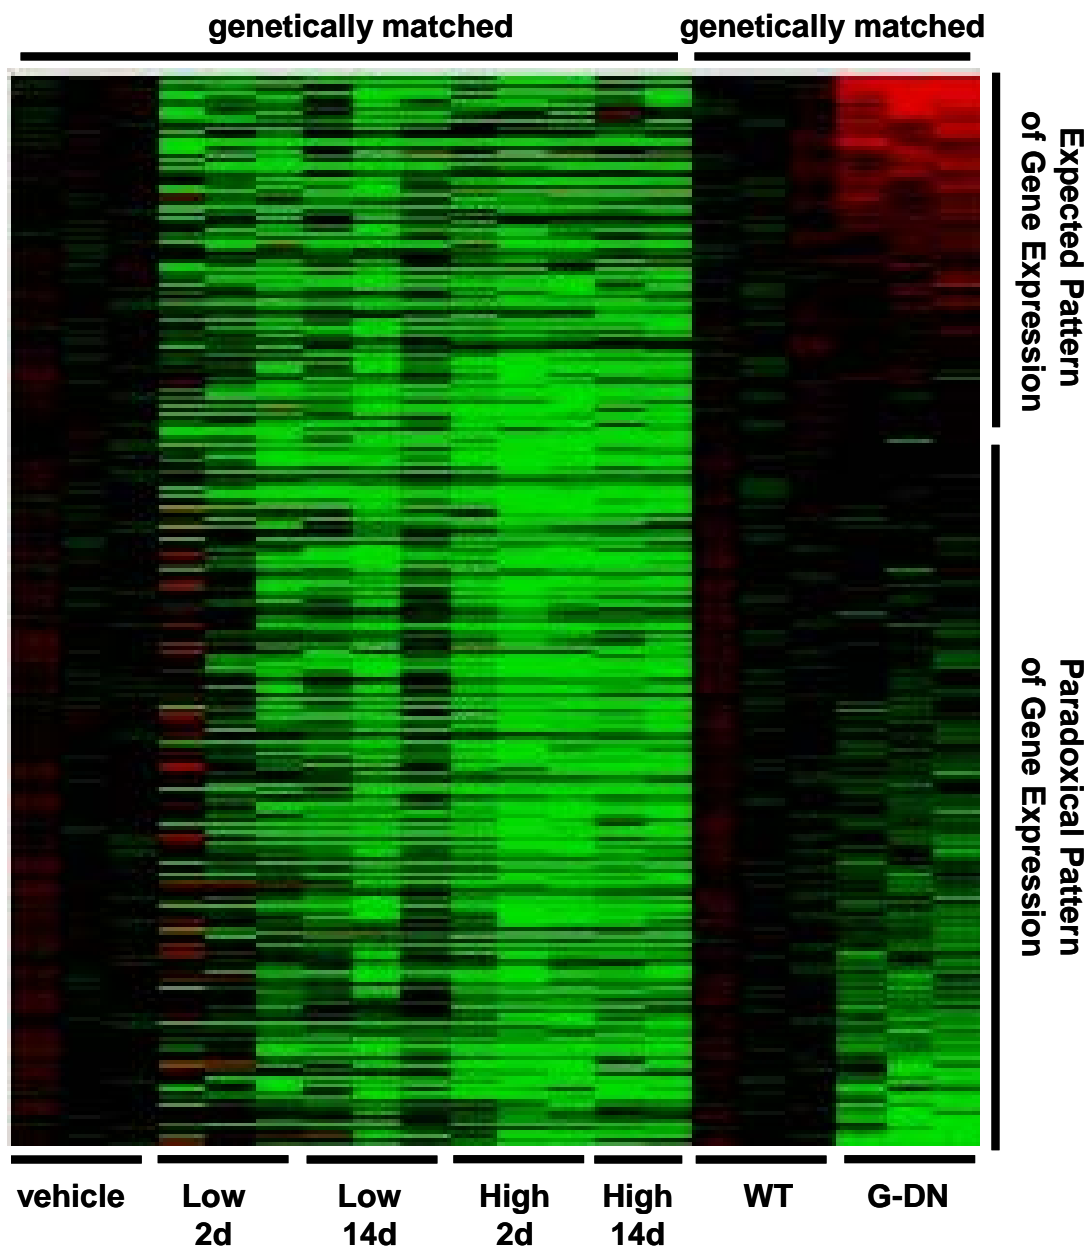

**Figure S3.** Expression clustering of genes down-regulated in at least one rosiglitazone treatment group. All gene expression values have been log<sub>2</sub> transformed and normalized to the appropriate control group. Wild-type littermates serve as control for the gene-targeted mice containing a dominant negative isoform of PPAR $\gamma$  (g-dn). Vehicle-treated mice are the control for mice receiving rosiglitazone, a high affinity ligand of PPAR $\gamma$ . Mice received rosiglitazone at either a low (3 mg/kg/day) or high (10 mg/kg/day) dose for either 2 or 14 d. Each column represents a sample, and each row represents a gene. Increasing intensity of red or green color indicates greater up- or down- regulation, respectively, relative to the appropriate control group. Black indicates no change in expression.

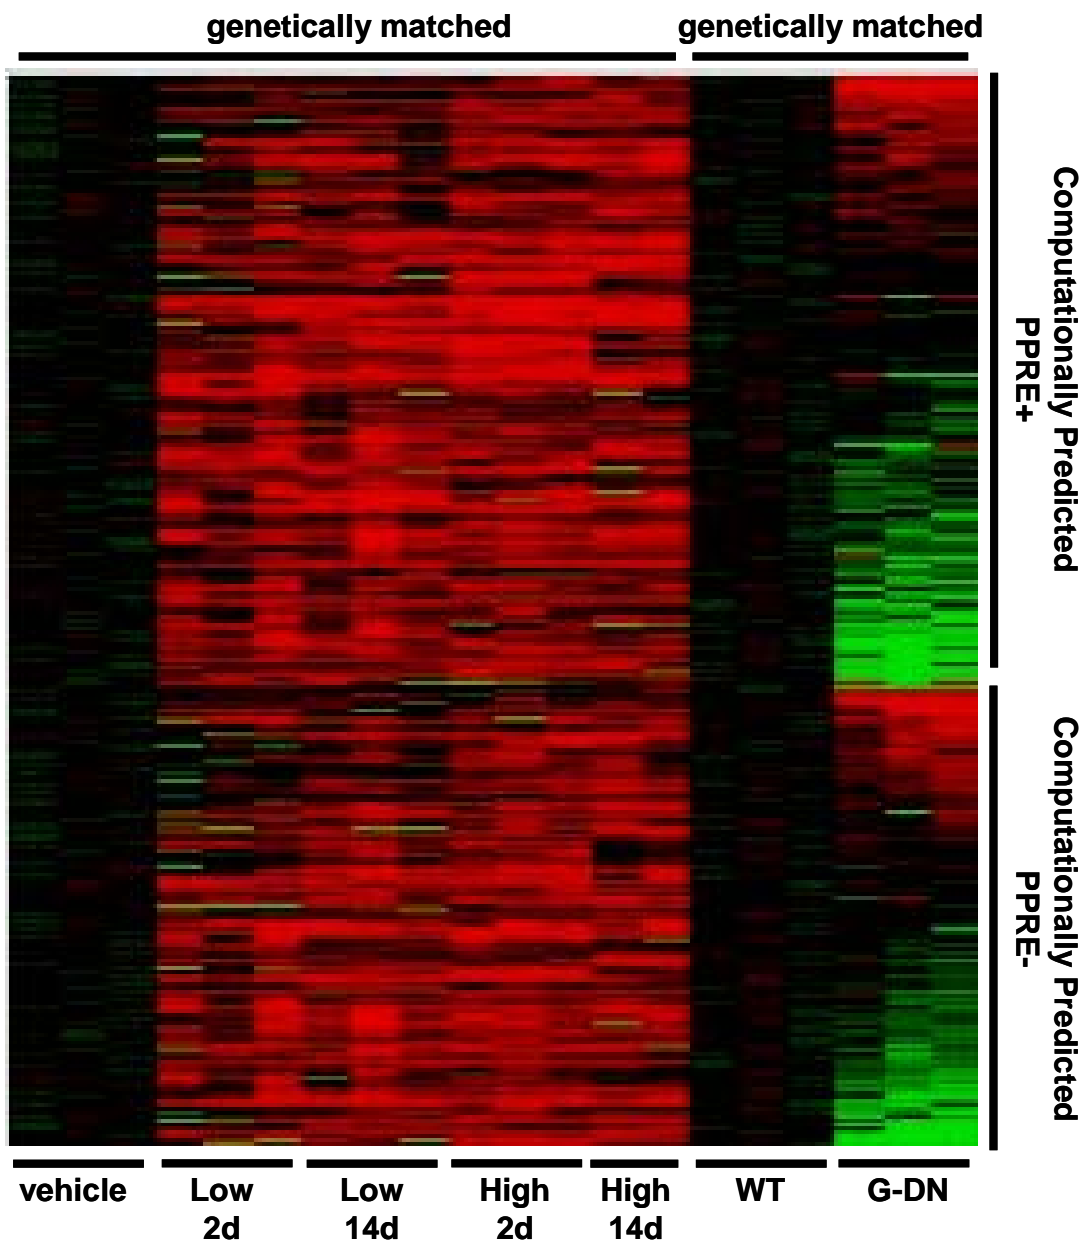

**Figure S4.** Expression clustering of genes up-regulated in at least one rosiglitazone treatment group sorted by the presence or absence of a computationally identified PPAR response element (PPRE). Analysis was performed as in Supplemental Figure 3.

Supplemental Table 1. Known PPAR gamma target genes.

| Gene    | Gene ID | Description                                                                 | PubMed ID         | Function                                                   |
|---------|---------|-----------------------------------------------------------------------------|-------------------|------------------------------------------------------------|
| ADFP    | 11520   | adipose differentiation related protein                                     | 16197558          | lipid metabolism, transport                                |
| ADIPOQ  | 11450   | adiponectin, C1Q and collagen domain containing                             | 12829629          | lipid metabolism, transport                                |
| ANGPTL4 | 57875   | angiopoietin-like 4                                                         | 15190076          | lipid metabolism                                           |
| APOE    | 11816   | apolipoprotein E                                                            | 11439103          | lipid metabolism, transport                                |
| AQP7    | 11832   | aquaporin 7                                                                 | 11679588;11952783 | transport                                                  |
| BCMO1   | 63857   | beta-carotene 15,15'-monooxygenase                                          | 12759335          | oxidoreductase activity                                    |
| CAT     | 12359   | catalase                                                                    | 12456800          | transport, oxidoreductase activity                         |
| CD36    | 12491   | CD36 antigen                                                                | 11716758          | transport, cell adhesion                                   |
| CIDEA   | 12683   | cell death-inducing DNA fragmentation factor, alpha subunit-like effector A | 17462989          | lipid metabolism                                           |
| CPT1A   | 12894   | carnitine palmitoyltransferase 1a, liver                                    | 17062566          | lipid metabolism, transport                                |
| DBI     | 13167   | diazepam binding inhibitor                                                  | 12015306          | transport                                                  |
| FABP4   | 11770   | fatty acid binding protein 4, adipocyte                                     | 12821652;15273253 | transport, lipid binding                                   |
| G0S2    | 14373   | G0/G1 switch gene 2                                                         | 16086669          | cell cycle                                                 |
| GCK     | 103988  | glucokinase                                                                 | 11872666;14749268 | glucose metabolism                                         |
| IGFBP1  | 16006   | insulin-like growth factor binding protein 1                                | 17062566          | growth factor binding                                      |
| IGFBP2  | 16008   | insulin-like growth factor binding protein 2                                | 17062566          | growth factor binding                                      |
| IGFBP5  | 16011   | insulin-like growth factor binding protein 5                                | 17062566          | growth factor binding                                      |
| INSIG1  | 231070  | insulin induced gene 1                                                      | 15073165          | protein binding                                            |
| LPL     | 16956   | lipoprotein lipase                                                          | 8895578;9535723   | lipid metabolism                                           |
| LRP1    | 16971   | low density lipoprotein receptor-related protein 1                          | 12551936          | transport                                                  |
| MC2R    | 17200   | melanocortin 2 receptor                                                     | 15028712          | G-protein coupled receptor activity                        |
| NPHS1   | 54631   | nephrosis 1 homolog, nephrin (human)                                        | 16687628          | transferase activity                                       |
| NR1D1   | 217166  | nuclear receptor subfamily 1, group D, member 1                             | 12821652          | transcription factor activity                              |
| NR1H3   | 22259   | nuclear receptor subfamily 1, group H, member 3                             | 11604492          | lipid metabolism, transport, transcription factor activity |
| PCK1    | 18534   | phosphoenolpyruvate carboxykinase 1, cytosolic                              | 10224131;11399762 | lipid metabolism                                           |
| PLIN    | 103968  | perilipin                                                                   | 14726448;14729975 | lipid metabolism                                           |
| PTGS2   | 19225   | prostaglandin-endoperoxide synthase 2                                       | 11809750          | lipid metabolism, prostaglandin biosynthesis               |

Supplemental Table 1. Known PPAR gamma target genes.

| Gene     | Gene ID | Description                                                                   | PubMed ID         | Function                       |
|----------|---------|-------------------------------------------------------------------------------|-------------------|--------------------------------|
| SCARB1   | 20778   | scavenger receptor class B, member 1                                          | 12763030          | cell adhesion                  |
| SCNN1G   | 20278   | sodium channel, nonvoltage-gated 1 gamma                                      | 16007095          | transport                      |
| SERPINE1 | 18787   | serine (or cysteine) peptidase inhibitor, clade E, member 1                   | 16843437          | plasminogen activator activity |
| SLC1A2   | 20511   | solute carrier family 1 (glial high affinity glutamate transporter), member 2 | 17213861          | transport                      |
| SLC22A1  | 20517   | solute carrier family 22 (organic cation transporter), member 1               | 15458920          | transport                      |
| SLC27A1  | 26457   | solute carrier family 27 (fatty acid transporter), member 1                   | 9933587           | lipid metabolism, transport    |
| SLC2A2   | 20526   | solute carrier family 2 (facilitated glucose transporter), member 2           | 10969836;15886523 | transport                      |
| SORBS1   | 20411   | sorbin and SH3 domain containing 1                                            | 10734046          | transport                      |
| TFF2     | 21785   | trefoil factor 2 (spasmolytic protein 1)                                      | 17118693          | defense response               |
| UCP1     | 22227   | uncoupling protein 1 (mitochondrial, proton carrier)                          | 11050084;8668156  | transport                      |

Supplemental Table 2. Expression changes of known PPAR gamma target genes during rosiglitazone treatments and in mice containing a dominant negative PPAR gamma (G-DN). Red or green represents statistically significant up- or down- regulation, respectively.

| ProbeSetID   | low2d | low14d | high2d | high14d | g-dn | Gene     | Gene ID | Description                                                                 |
|--------------|-------|--------|--------|---------|------|----------|---------|-----------------------------------------------------------------------------|
| 1423439_at   | 2.78  | 2.28   | 2.15   | 3.13    | 0.59 | Pck1     | 18534   | phosphoenolpyruvate carboxykinase 1, cytosolic                              |
| 1450884_at   | 2.71  | 2.29   | 2.75   | 3.09    | 0.58 | Cd36     | 12491   | CD36 antigen                                                                |
| 1424155_at   | 2.60  | 1.98   | 2.61   | 2.99    | 0.63 | Fabp4    | 11770   | fatty acid binding protein 4, adipocyte                                     |
| 1425809_at   | 2.12  | 1.74   | 1.94   | 2.70    | 0.76 | Fabp4    | 11770   | fatty acid binding protein 4, adipocyte                                     |
| 1417130_s_at | 3.04  | 2.33   | 1.96   | 2.63    | 0.88 | Angptl4  | 57875   | angiopoietin-like 4                                                         |
| 1418197_at   | 2.60  | 2.37   | 2.43   | 2.50    | 0.52 | Ucp1     | 22227   | uncoupling protein 1 (mitochondrial, proton carrier)                        |
| 1423166_at   | 2.18  | 1.79   | 2.01   | 2.49    | 0.60 | Cd36     | 12491   | CD36 antigen                                                                |
| 1417956_at   | 1.86  | 1.92   | 1.64   | 2.48    | 0.52 | Cidea    | 12683   | cell death-inducing DNA fragmentation factor, alpha subunit-like effector A |
| 1439617_s_at | 2.65  | 1.89   | 1.56   | 2.44    | 0.50 | Pck1     | 18534   | phosphoenolpyruvate carboxykinase 1, cytosolic                              |
| 1450883_a_at | 2.15  | 1.75   | 1.91   | 2.36    | 0.61 | Cd36     | 12491   | CD36 antigen                                                                |
| 1418848_at   | 1.90  | 1.67   | 1.50   | 2.26    | 0.69 | Aqp7     | 11832   | aquaporin 7                                                                 |
| 1422651_at   | 1.76  | 1.64   | 1.57   | 1.98    | 0.87 | Adipoq   | 11450   | adiponectin, C1Q and collagen domain containing                             |
| 1417023_a_at | 1.71  | 1.64   | 1.86   | 1.90    | 0.71 | Fabp4    | 11770   | fatty acid binding protein 4, adipocyte                                     |
| 1451263_a_at | 1.67  | 1.57   | 1.98   | 1.85    | 0.77 | Fabp4    | 11770   | fatty acid binding protein 4, adipocyte                                     |
| 1448700_at   | 1.32  | 1.18   | 1.43   | 1.79    | 0.66 | G0s2     | 14373   | G0/G1 switch gene 2                                                         |
| 1415904_at   | 1.59  | 1.51   | 1.64   | 1.75    | 0.93 | Lpl      | 16956   | lipoprotein lipase                                                          |
| 1419149_at   | 1.39  | 1.43   | 1.60   | 1.65    | 1.30 | Serpine1 | 18787   | serine (or cysteine) peptidase inhibitor, clade E, member 1                 |
| 1443983_at   | 1.08  | 1.40   | 1.39   | 1.54    | 1.14 | Sorbs1   | 20411   | Sorbin and SH3 domain containing 1                                          |
| 1422432_at   | 1.50  | 1.36   | 1.43   | 1.48    | 0.81 | Dbi      | 13167   | diazepam binding inhibitor                                                  |
| 1440311_at   | 0.97  | 1.23   | 1.25   | 1.47    | 1.10 | Sorbs1   | 20411   | sorbin and SH3 domain containing 1                                          |
| 1418849_x_at | 1.92  | 1.37   | 1.27   | 1.41    | 0.60 | Aqp7     | 11832   | aquaporin 7                                                                 |
| 1438093_x_at | 1.32  | 1.34   | 1.45   | 1.40    | 0.89 | Dbi      | 13167   | diazepam binding inhibitor                                                  |
| 1417262_at   | 1.02  | 0.84   | 1.15   | 1.39    | 1.12 | Ptgs2    | 19225   | prostaglandin-endoperoxide synthase 2                                       |
| 1436737_a_at | 1.14  | 1.06   | 1.28   | 1.39    | 1.05 | Sorbs1   | 20411   | sorbin and SH3 domain containing 1                                          |
| 1416429_a_at | 1.31  | 1.10   | 1.33   | 1.36    | 0.91 | Cat      | 12359   | catalase                                                                    |
| 1455820_x_at | 1.43  | 1.19   | 1.18   | 1.36    | 0.89 | Scarb1   | 20778   | scavenger receptor class B, member 1                                        |
| 1437378_x_at | 1.52  | 1.12   | 1.14   | 1.35    | 0.85 | Scarb1   | 20778   | scavenger receptor class B, member 1                                        |
| 1433991_x_at | 1.32  | 1.23   | 1.34   | 1.34    | 0.91 | Dbi      | 13167   | diazepam binding inhibitor                                                  |
| 1455976_x_at | 1.24  | 1.19   | 1.28   | 1.28    | 0.87 | Dbi      | 13167   | diazepam binding inhibitor                                                  |
| 1448318_at   | 1.37  | 1.14   | 1.03   | 1.26    | 0.77 | Adfp     | 11520   | adipose differentiation related protein                                     |
| 1455967_at   | 1.04  | 1.17   | 1.19   | 1.23    | 0.98 | Sorbs1   | 20411   | sorbin and SH3 domain containing 1                                          |

Supplemental Table 2. Expression changes of known PPAR gamma target genes during rosiglitazone treatments and in mice containing a dominant negative PPAR gamma (G-DN). Red or green represents statistically significant up- or down- regulation, respectively.

| ProbeSetID   | low2d | low14d | high2d | high14d | g-dn | Gene    | Gene ID | Description                                                                   |
|--------------|-------|--------|--------|---------|------|---------|---------|-------------------------------------------------------------------------------|
| 1441413_at   | 1.11  | 1.23   | 1.15   | 1.23    | 0.97 | Cat     | 12359   | Catalase                                                                      |
| 1428471_at   | 0.96  | 0.99   | 1.16   | 1.21    | 1.02 | Sorbs1  | 20411   | sorbin and SH3 domain containing 1                                            |
| 1416050_a_at | 1.33  | 1.10   | 1.11   | 1.20    | 0.90 | Scarb1  | 20778   | scavenger receptor class B, member 1                                          |
| 1433094_at   | 0.98  | 1.07   | 1.06   | 1.18    | 0.92 | Slc1a2  | 20511   | solute carrier family 1 (glial high affinity glutamate transporter), member 2 |
| 1425826_a_at | 1.07  | 1.04   | 1.05   | 1.17    | 0.86 | Sorbs1  | 20411   | sorbin and SH3 domain containing 1                                            |
| 1449907_at   | 1.08  | 1.23   | 1.15   | 1.12    | 0.98 | Bcmo1   | 63857   | beta-carotene 15,15'-monooxygenase                                            |
| 1449067_at   | 1.14  | 1.00   | 1.07   | 1.12    | 0.91 | Slc2a2  | 20526   | solute carrier family 2 (facilitated glucose transporter), member 2           |
| 1422142_at   | 1.09  | 1.13   | 1.16   | 1.12    | 0.93 | Nphs1   | 54631   | nephrosis 1 homolog, nephrin (human)                                          |
| 1419146_a_at | 1.22  | 1.06   | 1.10   | 1.10    | 1.04 | Gck     | 103988  | glucokinase                                                                   |
| 1418918_at   | 1.13  | 1.16   | 1.12   | 1.10    | 1.10 | Igfbp1  | 16006   | insulin-like growth factor binding protein 1                                  |
| 1416430_at   | 1.22  | 1.03   | 1.13   | 1.09    | 0.82 | Cat     | 12359   | catalase                                                                      |
| 1417263_at   | 1.02  | 0.95   | 0.93   | 1.09    | 1.14 | Ptgs2   | 19225   | prostaglandin-endoperoxide synthase 2                                         |
| 1442401_at   | 1.13  | 1.19   | 1.19   | 1.07    | 0.92 | Sorbs1  | 20411   | Sorbin and SH3 domain containing 1                                            |
| 1417358_s_at | 0.97  | 0.99   | 1.04   | 1.06    | 0.82 | Sorbs1  | 20411   | sorbin and SH3 domain containing 1                                            |
| 1459763_at   | 1.05  | 1.13   | 1.03   | 1.05    | 1.04 | Adipoq  | 11450   | Adiponectin, C1Q and collagen domain containing                               |
| 1458314_at   | 1.04  | 1.13   | 1.10   | 1.05    | 0.92 | Slc1a2  | 20511   | Solute carrier family 1 (glial high affinity glutamate transporter), member 2 |
| 1422448_at   | 0.99  | 1.14   | 1.05   | 1.04    | 0.94 | Tff2    | 21785   | trefoil factor 2 (spasmodic protein 1)                                        |
| 1432466_a_at | 1.07  | 1.04   | 0.83   | 1.03    | 0.90 | Apoe    | 11816   | apolipoprotein E                                                              |
| 1422926_at   | 1.05  | 0.97   | 0.94   | 1.03    | 1.05 | Mc2r    | 17200   | melanocortin 2 receptor                                                       |
| 1419079_at   | 1.30  | 1.13   | 1.19   | 1.03    | 0.94 | Scnn1g  | 20278   | sodium channel, nonvoltage-gated 1 gamma                                      |
| 1450444_a_at | 1.06  | 0.97   | 0.91   | 1.03    | 0.79 | Nr1h3   | 22259   | nuclear receptor subfamily 1, group H, member 3                               |
| 1446993_at   | 0.99  | 1.01   | 1.00   | 1.01    | 0.92 | Plin    | 103968  | Perilipin                                                                     |
| 1434866_x_at | 0.99  | 0.83   | 0.93   | 1.00    | 1.30 | Cpt1a   | 12894   | carnitine palmitoyltransferase 1a, liver                                      |
| 1451627_a_at | 1.04  | 1.12   | 0.97   | 1.00    | 0.97 | Slc1a2  | 20511   | solute carrier family 1 (glial high affinity glutamate transporter), member 2 |
| 1453410_at   | 1.10  | 1.10   | 1.02   | 0.97    | 1.06 | Angptl4 | 57875   | angiopoietin-like 4                                                           |
| 1455209_at   | 1.17  | 1.17   | 1.10   | 0.97    | 1.03 | Pck1    | 18534   | Phosphoenolpyruvate carboxykinase 1, cytosolic                                |
| 1438156_x_at | 0.94  | 0.87   | 0.94   | 0.96    | 1.37 | Cpt1a   | 12894   | carnitine palmitoyltransferase 1a, liver                                      |
| 1425303_at   | 0.90  | 1.03   | 1.04   | 0.96    | 0.94 | Gck     | 103988  | glucokinase                                                                   |
| 1418118_at   | 1.02  | 0.99   | 0.95   | 0.95    | 1.18 | Slc22a1 | 20517   | solute carrier family 22 (organic cation transporter), member 1               |
| 1426464_at   | 1.20  | 1.25   | 1.00   | 0.95    | 0.97 | Nr1d1   | 217166  | nuclear receptor subfamily 1, group D, member 1                               |
| 1435658_at   | 1.38  | 0.96   | 1.13   | 0.94    | 0.71 | Slc27a1 | 26457   | solute carrier family 27 (fatty acid transporter), member 1                   |

Supplemental Table 2. Expression changes of known PPAR gamma target genes during rosiglitazone treatments and in mice containing a dominant negative PPAR gamma (G-DN). Red or green represents statistically significant up- or down- regulation, respectively.

| ProbeSetID   | low2d | low14d | high2d | high14d | g-dn | Gene    | Gene ID | Description                                                 |
|--------------|-------|--------|--------|---------|------|---------|---------|-------------------------------------------------------------|
| 1442849_at   | 0.97  | 0.88   | 0.98   | 0.93    | 1.15 | Lrp1    | 16971   | low density lipoprotein receptor-related protein 1          |
| 1447582_x_at | 1.01  | 1.08   | 1.02   | 0.90    | 1.09 | Adipoq  | 11450   | Adiponectin, C1Q and collagen domain containing             |
| 1454671_at   | 1.22  | 1.03   | 1.11   | 0.90    | 0.88 | Insig1  | 231070  | insulin induced gene 1                                      |
| 1448655_at   | 0.98  | 0.92   | 0.88   | 0.85    | 0.96 | Lrp1    | 16971   | low density lipoprotein receptor-related protein 1          |
| 1422811_at   | 1.33  | 0.94   | 0.88   | 0.83    | 0.71 | Slc27a1 | 26457   | solute carrier family 27 (fatty acid transporter), member 1 |
| 1460409_at   | 0.99  | 0.85   | 0.80   | 0.78    | 1.17 | Cpt1a   | 12894   | carnitine palmitoyltransferase 1a, liver                    |
| 1422313_a_at | 0.79  | 0.76   | 0.79   | 0.76    | 0.98 | Igfbp5  | 16011   | insulin-like growth factor binding protein 5                |
| 1454159_a_at | 0.91  | 0.72   | 0.55   | 0.68    | 0.82 | Igfbp2  | 16008   | insulin-like growth factor binding protein 2                |
| 1452114_s_at | 0.72  | 0.67   | 0.68   | 0.62    | 1.03 | Igfbp5  | 16011   | insulin-like growth factor binding protein 5                |

Supplemental Table 3. Normalized enrichment values from GSEA analysis using sets of genes responsive to rosiglitazone in adipocytes. Top refers to expressed genes showing the largest fold changes compared to control samples. Red or green represents statistically significant up- or down- regulation, respectively.

| Gene Set  | low2d | low14d | high2d | high14d | g-dn  |
|-----------|-------|--------|--------|---------|-------|
| Top-25    | 2.09  | 1.48   | 1.27   | 1.51    | -1.47 |
| Top-50    | 2.19  | 1.48   | 1.49   | 1.73    | -1.85 |
| Top-75    | 2.32  | 1.58   | 1.38   | 1.87    | -1.77 |
| Top-100   | 2.14  | 1.44   | 1.35   | 1.85    | -1.67 |
| Top-125   | 2.04  | 1.40   | 1.36   | 1.73    | -1.79 |
| Top-150   | 1.98  | 1.37   | 1.26   | 1.76    | -1.81 |
| Random-50 | 0.67  | -0.80  | -1.28  | 0.82    | 0.86  |



Supplemental Table 4. Normalized enrichment values from GSEA analysis using sets of genes from Gene Ontology (GO) or the UniProt knowledgebase (KW). Red or green represents statistically significant up- or down- regulation, respectively.

| GeneSet                                                                        | low2d | low14d | high2d | high14d | g-dn  |
|--------------------------------------------------------------------------------|-------|--------|--------|---------|-------|
| GO ; fatty acid metabolic process ; 0006631                                    | 2.47  | 1.67   | 1.46   | 2.12    | -2.37 |
| GO ; acetyl-CoA C-acyltransferase activity ; 0003988                           | 1.88  | 1.86   | 1.50   | 2.05    | -1.90 |
| KW ; Chylomicron                                                               | 1.93  | 1.61   | 1.61   | 1.85    | -1.81 |
| GO ; chylomicron ; 0042627                                                     | 1.81  | 1.76   | 1.74   | 1.79    | -1.71 |
| GO ; signal peptidase activity ; 0009003                                       | 2.13  | 1.74   | 1.77   | 2.04    | -1.70 |
| GO ; water channel activity ; 0015250                                          | 1.70  | 1.77   | 1.71   | 1.70    | -1.69 |
| GO ; mitochondrial respiratory chain ; 0005746                                 | 2.06  | 1.67   | 1.61   | 1.93    | -1.69 |
| GO ; water transport ; 0006833                                                 | 1.66  | 1.70   | 1.66   | 1.72    | -1.68 |
| GO ; G-protein activated inward rectifier potassium channel activity ; 0015467 | 1.81  | 1.69   | 1.81   | 1.53    | -1.67 |
| GO ; extracellular region ; 0005576                                            | 1.63  | 1.40   | 1.41   | 1.26    | -1.65 |
| KW ; Ionic channel                                                             | 1.48  | 1.63   | 1.64   | 1.42    | -1.64 |
| KW ; VLDL                                                                      | 1.98  | 1.80   | 1.72   | 2.07    | -1.64 |
| GO ; serotonin receptor activity ; 0004993                                     | 1.68  | 1.88   | 1.76   | 1.60    | -1.63 |
| GO ; sodium ion binding ; 0031402                                              | 2.12  | 1.46   | 1.60   | 1.72    | -1.62 |
| GO ; trypsin activity ; 0004295                                                | 1.68  | 1.62   | 1.50   | 1.56    | -1.62 |
| GO ; voltage-gated ion channel activity ; 0005244                              | 1.43  | 1.42   | 1.36   | 1.29    | -1.61 |
| KW ; Amidation                                                                 | 1.83  | 1.97   | 1.98   | 2.05    | -1.60 |
| KW ; Voltage-gated channel                                                     | 1.47  | 1.51   | 1.41   | 1.42    | -1.60 |
| GO ; rhodopsin-like receptor activity ; 0001584                                | 1.83  | 1.89   | 1.96   | 1.51    | -1.60 |
| KW ; G-protein coupled receptor                                                | 1.78  | 1.78   | 1.79   | 1.47    | -1.58 |
| GO ; ion channel activity ; 0005216                                            | 1.51  | 1.54   | 1.61   | 1.32    | -1.57 |
| GO ; chymotrypsin activity ; 0004263                                           | 1.63  | 1.69   | 1.39   | 1.43    | -1.57 |
| GO ; G-protein coupled receptor activity ; 0004930                             | 1.80  | 1.86   | 1.90   | 1.53    | -1.57 |

Supplemental Table 4. Normalized enrichment values from GSEA analysis using sets of genes from Gene Ontology (GO) or the UniProt knowledgebase (KW). Red or green represents statistically significant up- or down- regulation, respectively.

| GeneSet                                                                                                  | low2d | low14d | high2d | high14d | g-dn  |
|----------------------------------------------------------------------------------------------------------|-------|--------|--------|---------|-------|
| GO ; sodium ion transport ; 0006814                                                                      | 2.09  | 1.50   | 1.63   | 1.63    | -1.55 |
| GO ; potassium channel activity ; 0005267                                                                | 1.57  | 1.62   | 1.69   | 1.51    | -1.55 |
| GO ; ion transport ; 0006811                                                                             | 1.58  | 1.35   | 1.46   | 1.17    | -1.53 |
| GO ; G-protein coupled receptor protein signaling pathway ; 0007186                                      | 1.51  | 1.60   | 1.57   | 1.28    | -1.51 |
| KW ; Transducer                                                                                          | 1.49  | 1.56   | 1.51   | 1.28    | -1.49 |
| KW ; Sodium transport                                                                                    | 2.01  | 1.37   | 1.52   | 1.57    | -1.48 |
| KW ; Ion transport                                                                                       | 1.55  | 1.34   | 1.43   | 1.21    | -1.47 |
| KW ; Sodium                                                                                              | 1.99  | 1.36   | 1.50   | 1.56    | -1.44 |
| KW ; Potassium channel                                                                                   | 1.43  | 1.62   | 1.43   | 1.58    | -1.43 |
| KW ; Potassium transport                                                                                 | 1.64  | 1.50   | 1.36   | 1.42    | -1.39 |
| GO ; potassium ion binding ; 0030955                                                                     | 1.69  | 1.46   | 1.39   | 1.43    | -1.35 |
| GO ; symporter activity ; 0015293                                                                        | 1.99  | 1.63   | 1.34   | 1.52    | -1.34 |
| KW ; Potassium                                                                                           | 1.63  | 1.46   | 1.30   | 1.46    | -1.32 |
| KW ; mRNA splicing                                                                                       | -2.27 | -2.12  | -2.14  | -1.46   | 1.92  |
| GO ; immunoglobulin mediated immune response ; 0016064                                                   | -1.56 | -1.58  | -2.28  | -1.80   | 1.90  |
| GO ; RNA splicing ; 0008380                                                                              | -2.23 | -1.99  | -2.09  | -1.36   | 1.89  |
| KW ; mRNA processing                                                                                     | -2.26 | -2.03  | -2.12  | -1.55   | 1.82  |
| GO ; positive regulation of immune response ; 0050778                                                    | -1.90 | -1.62  | -2.08  | -1.50   | 1.75  |
| GO ; mRNA processing ; 0006397                                                                           | -2.08 | -1.97  | -2.06  | -1.48   | 1.73  |
| GO ; neural crest cell development ; 0014032                                                             | -1.76 | -1.88  | -1.63  | -1.71   | 1.66  |
| GO ; myeloid cell differentiation ; 0030099                                                              | -1.45 | -1.93  | -1.78  | -1.94   | 1.63  |
| GO ; ribonucleoside-diphosphate reductase activity ; 0004748                                             | -1.87 | -2.17  | -1.84  | -1.63   | 1.61  |
| GO ; antigen processing and presentation of peptide or polysaccharide antigen via MHC class II ; 0002504 | -2.44 | -2.04  | -2.49  | -2.01   | 1.61  |

Supplemental Table 4. Normalized enrichment values from GSEA analysis using sets of genes from Gene Ontology (GO) or the UniProt knowledgebase (KW). Red or green represents statistically significant up- or down- regulation, respectively.

| GeneSet                                                    | low2d | low14d | high2d | high14d | g-dn |
|------------------------------------------------------------|-------|--------|--------|---------|------|
| GO ; MHC class II protein complex ; 0042613                | -2.42 | -2.04  | -2.50  | -1.93   | 1.58 |
| GO ; common-partner SMAD protein phosphorylation ; 0007182 | -1.85 | -1.99  | -2.18  | -1.73   | 1.56 |
| GO ; spliceosome ; 0005681                                 | -2.03 | -1.98  | -2.09  | -1.64   | 1.52 |
| KW ; Chromatin regulator                                   | -1.90 | -1.58  | -1.60  | -1.39   | 1.44 |
| GO ; chromatin modification ; 0016568                      | -1.77 | -1.61  | -1.71  | -1.47   | 1.39 |
| KW ; Spliceosome                                           | -1.99 | -2.11  | -2.16  | -1.65   | 1.37 |
| GO ; regulation of GTPase activity ; 0043087               | -1.58 | -1.72  | -1.68  | -1.63   | 1.34 |
| KW ; Chromosomal rearrangement                             | -1.47 | -1.35  | -1.38  | -1.41   | 1.33 |
| GO ; ubiquitin cycle ; 0006512                             | -1.69 | -1.58  | -1.65  | -1.41   | 1.31 |
| KW ; DNA damage                                            | -1.42 | -1.32  | -1.37  | -1.30   | 1.29 |
| KW ; Proto-oncogene                                        | -1.37 | -1.36  | -1.42  | -1.33   | 1.29 |
| KW ; DNA repair                                            | -1.29 | -1.32  | -1.45  | -1.25   | 1.27 |
| GO ; response to DNA damage stimulus ; 0006974             | -1.29 | -1.32  | -1.37  | -1.41   | 1.22 |
| KW ; Ubl conjugation pathway                               | -1.49 | -1.57  | -1.53  | -1.42   | 1.19 |
| KW ; Activator                                             | -1.19 | -1.48  | -1.40  | -1.28   | 1.11 |

Supplemental Table 5. Genes up-regulated in at least 1 rosiglitazone treatment group and changed (up or down) in mice containing a dominant negative PPAR gamma. Red or green represents statistically significant up- or down- regulation, respectively.

| ProbeSet     | low2d | low14d | high2d | high14d | gdn  | gene                          | description                                                                    |
|--------------|-------|--------|--------|---------|------|-------------------------------|--------------------------------------------------------------------------------|
| 1420722_at   | 1.82  | 1.22   | 2.25   | 1.51    | 0.16 | <a href="#">Elov3</a>         | elongation of very long chain fatty acids (FEN1/Elo2, SUR4/Elo3, yeast)-like 3 |
| 1424451_at   | 3.14  | 3.33   | 4.41   | 7.64    | 0.23 | <a href="#">Acaa1b</a>        | acetyl-Coenzyme A acyltransferase 1B                                           |
| 1416316_at   | 3.29  | 1.96   | 1.93   | 2.88    | 0.33 | <a href="#">Slc27a2</a>       | solute carrier family 27 (fatty acid transporter), member 2                    |
| 1451679_at   | 2.03  | 1.51   | 2.12   | 2.09    | 0.41 | <a href="#">6530401D17Rik</a> | RIKEN cDNA 6530401D17 gene                                                     |
| 1418328_at   | 2.37  | 1.80   | 1.41   | 2.02    | 0.42 | <a href="#">Cpt1b</a>         | carnitine palmitoyltransferase 1b, muscle                                      |
| 1428333_at   | 2.71  | 1.82   | 3.01   | 2.83    | 0.42 | <a href="#">2900062L11Rik</a> | RIKEN cDNA 2900062L11 gene                                                     |
| 1436233_at   | 2.25  | 2.17   | 2.44   | 4.58    | 0.43 | <a href="#">AI117581</a>      | expressed sequence AI117581                                                    |
| 1449218_at   | 2.20  | 2.13   | 1.51   | 2.64    | 0.46 | <a href="#">Cox8b</a>         | cytochrome c oxidase, subunit VIIIb                                            |
| 1449461_at   | 3.51  | 2.75   | 3.97   | 6.88    | 0.48 | <a href="#">Rbp7</a>          | retinol binding protein 7, cellular                                            |
| 1460521_a_at | 1.35  | 1.13   | 1.24   | 1.72    | 0.50 | <a href="#">Obfc2a</a>        | oligonucleotide/oligosaccharide-binding fold containing 2A                     |
| 1416023_at   | 1.47  | 1.82   | 1.21   | 2.50    | 0.54 | <a href="#">Fabp3</a>         | fatty acid binding protein 3, muscle and heart                                 |
| 1448499_a_at | 1.69  | 1.61   | 1.71   | 2.34    | 0.60 | <a href="#">Ephx2</a>         | epoxide hydrolase 2, cytoplasmic                                               |
| 1453004_at   | 1.48  | 1.25   | 1.09   | 1.41    | 0.64 | <a href="#">3110004L20Rik</a> | RIKEN cDNA 3110004L20 gene                                                     |
| 1448382_at   | 1.77  | 1.32   | 1.54   | 1.85    | 0.66 | <a href="#">Ehhadh</a>        | enoyl-Coenzyme A, hydratase/3-hydroxyacyl Coenzyme A dehydrogenase             |
| 1454067_a_at | 1.57  | 1.56   | 1.71   | 1.93    | 0.66 | <a href="#">4931406C07Rik</a> | RIKEN cDNA 4931406C07 gene                                                     |
| 1431789_s_at | 1.40  | 1.41   | 1.51   | 1.57    | 0.68 | <a href="#">Tmed5</a>         | transmembrane emp24 protein transport domain containing 5                      |

Supplemental Table 5. Genes up-regulated in at least 1 rosiglitazone treatment group and changed (up or down) in mice containing a dominant negative PPAR gamma. Red or green represents statistically significant up- or down- regulation, respectively.

| ProbeSet     | low2d | low14d | high2d | high14d | gdn  | gene                          | description                                                                                    |
|--------------|-------|--------|--------|---------|------|-------------------------------|------------------------------------------------------------------------------------------------|
| 1425216_at   | 1.21  | 1.19   | 1.34   | 1.19    | 0.69 | <a href="#">Ffar2</a>         | free fatty acid receptor 2                                                                     |
| 1428435_at   | 1.16  | 1.18   | 1.40   | 1.38    | 0.70 | <a href="#">Muc2</a>          | mucin 2                                                                                        |
| 1453592_at   | 1.20  | 1.22   | 1.42   | 1.44    | 0.71 | <a href="#">Lrrc39</a>        | leucine rich repeat containing 39                                                              |
| 1417023_a_at | 1.71  | 1.64   | 1.86   | 1.90    | 0.71 | <a href="#">Fabp4</a>         | fatty acid binding protein 4, adipocyte                                                        |
| 1424653_at   | 1.28  | 1.15   | 1.02   | 1.01    | 0.72 | <a href="#">LOC669875</a>     | similar to Tetraspanin-15 (Tspan-15) (Transmembrane 4 superfamily member 15) (Tetraspan NET-7) |
| 1432380_s_at | 1.31  | 1.25   | 1.26   | 1.21    | 0.72 | <a href="#">LOC665769</a>     | similar to gasdermin 1                                                                         |
| 1455279_at   | 1.22  | 1.29   | 1.17   | 1.21    | 0.74 | <a href="#">Gm1060</a>        | gene model 1060, (NCBI)                                                                        |
| 1444063_at   | 1.24  | 1.10   | 1.32   | 1.32    | 0.74 | <a href="#">5430435G22Rik</a> | RIKEN cDNA 5430435G22 gene                                                                     |
| 1445802_at   | 1.22  | 1.30   | 1.35   | 1.26    | 0.76 | <a href="#">AU017455</a>      | Expressed sequence AU017455                                                                    |
| 1415847_at   | 1.21  | 1.31   | 1.09   | 1.19    | 0.77 | <a href="#">Ldhc</a>          | lactate dehydrogenase C                                                                        |
| 1439838_a_at | 1.15  | 1.23   | 1.10   | 1.16    | 0.78 | <a href="#">Tmie</a>          | transmembrane inner ear                                                                        |
| 1432749_at   | 1.11  | 1.22   | 1.07   | 1.04    | 0.79 | <a href="#">Cryga</a>         | Crystallin, gamma A                                                                            |
| 1458260_at   | 1.26  | 1.03   | 1.11   | 1.14    | 0.79 | <a href="#">Espn</a>          | Espin                                                                                          |
| 1458377_at   | 1.24  | 1.19   | 1.05   | 1.11    | 0.80 | <a href="#">Crsp7</a>         | cofactor required for Sp1 transcriptional activation, subunit 7                                |
| 1420571_at   | 1.06  | 1.20   | 1.24   | 1.10    | 0.80 | <a href="#">Prllpb</a>        | prolactin-like protein B                                                                       |
| 1453932_at   | 1.23  | 1.02   | 1.21   | 1.15    | 0.80 | <a href="#">4931433A01Rik</a> | RIKEN cDNA 4931433A01 gene                                                                     |

Supplemental Table 5. Genes up-regulated in at least 1 rosiglitazone treatment group and changed (up or down) in mice containing a dominant negative PPAR gamma. Red or green represents statistically significant up- or down- regulation, respectively.

| ProbeSet     | low2d | low14d | high2d | high14d | gdn  | gene                          | description                                                                |
|--------------|-------|--------|--------|---------|------|-------------------------------|----------------------------------------------------------------------------|
| 1459974_x_at | 1.24  | 1.18   | 1.19   | 1.07    | 0.80 | <a href="#">Tbc1d9b</a>       | TBC1 domain family, member 9B                                              |
| 1454291_at   | 1.19  | 1.14   | 1.13   | 1.25    | 0.80 | <a href="#">4933428P19Rik</a> | RIKEN cDNA 4933428P19 gene                                                 |
| 1446574_at   | 1.37  | 1.18   | 1.30   | 1.27    | 0.80 | <a href="#">Ncor1</a>         | Nuclear receptor co-repressor 1                                            |
| 1453123_at   | 1.05  | 1.11   | 1.25   | 1.02    | 0.81 | <a href="#">Sf3b2</a>         | splicing factor 3b, subunit 2                                              |
| 1435124_at   | 1.06  | 1.22   | 1.13   | 1.11    | 0.81 | <a href="#">EG328644</a>      | predicted gene, EG328644                                                   |
| 1433238_at   | 1.06  | 1.21   | 1.22   | 1.17    | 0.81 | <a href="#">4930448E06Rik</a> | RIKEN cDNA 4930448E06 gene                                                 |
| 1425177_at   | 1.18  | 1.27   | 1.09   | 1.24    | 0.81 | <a href="#">Shmt1</a>         | serine hydroxymethyl transferase 1 (soluble)                               |
| 1443670_at   | 1.24  | 1.24   | 1.27   | 1.27    | 0.81 | <a href="#">2010001J22Rik</a> | RIKEN cDNA 2010001J22 gene                                                 |
| 1423578_at   | 1.23  | 1.26   | 1.25   | 1.37    | 0.81 | <a href="#">Col11a2</a>       | procollagen, type XI, alpha 2                                              |
| 1441211_at   | 1.14  | 1.24   | 1.29   | 1.25    | 0.82 | <a href="#">Kcns2</a>         | K+ voltage-gated channel, subfamily S, 2                                   |
| 1426391_at   | 1.01  | 1.23   | 1.25   | 1.30    | 0.83 | <a href="#">LOC545267</a>     | similar to ADP-ribosylation factor 1                                       |
| 1437646_at   | 1.18  | 1.22   | 1.25   | 1.19    | 0.83 | <a href="#">LOC631806</a>     | similar to Goliath homolog precursor (Ring finger protein 130) (R-goliath) |
| 1458027_at   | 1.07  | 1.18   | 1.25   | 1.13    | 1.21 | <a href="#">Mrpl17</a>        | mitochondrial ribosomal protein L17                                        |
| 1442776_at   | 1.04  | 1.28   | 1.20   | 1.13    | 1.24 | <a href="#">2310009E04Rik</a> | RIKEN cDNA 2310009E04 gene                                                 |
| 1437521_s_at | 1.06  | 1.09   | 1.14   | 1.26    | 1.25 | <a href="#">E230022H04Rik</a> | RIKEN cDNA E230022H04 gene                                                 |
| 1431004_at   | 1.29  | 1.05   | 1.17   | 1.04    | 1.26 | <a href="#">Loxl2</a>         | lysyl oxidase-like 2                                                       |

Supplemental Table 5. Genes up-regulated in at least 1 rosiglitazone treatment group and changed (up or down) in mice containing a dominant negative PPAR gamma. Red or green represents statistically significant up- or down- regulation, respectively.

| ProbeSet     | low2d | low14d | high2d | high14d | gdn  | gene                    | description                                                                              |
|--------------|-------|--------|--------|---------|------|-------------------------|------------------------------------------------------------------------------------------|
| 1427830_at   | 1.08  | 1.06   | 1.20   | 1.35    | 1.26 | <a href="#">Zfp260</a>  | zinc finger protein 260                                                                  |
| 1439028_at   | 1.19  | 1.21   | 1.32   | 1.30    | 1.27 | <a href="#">Ufm1</a>    | ubiquitin-fold modifier 1                                                                |
| 1447473_at   | 1.12  | 1.11   | 1.37   | 1.15    | 1.30 | <a href="#">Anapc10</a> | Transcribed locus                                                                        |
| 1440346_at   | 1.04  | 1.19   | 1.29   | 1.27    | 1.33 | <a href="#">Jmjd3</a>   | Jumonji domain containing 3                                                              |
| 1446968_at   | 1.12  | 1.10   | 1.37   | 1.27    | 1.34 | <a href="#">Picalm</a>  | phosphatidylinositol binding clathrin assembly protein                                   |
| 1438842_at   | 1.05  | 1.15   | 1.36   | 1.33    | 1.36 | <a href="#">Mitch2</a>  | mitochondrial carrier homolog 2 (C. elegans)                                             |
| 1420982_at   | 1.01  | 1.26   | 1.27   | 1.16    | 1.39 | <a href="#">Rbm39</a>   | RNA binding motif protein 39                                                             |
| 1418623_at   | 1.09  | 1.35   | 1.29   | 1.21    | 1.43 | <a href="#">Rab2</a>    | RAB2, member RAS oncogene family                                                         |
| 1436981_a_at | 1.09  | 1.24   | 1.63   | 1.78    | 1.57 | <a href="#">Ywhaz</a>   | tyrosine 3-monooxygenase/tryptophan 5-monooxygenase activation protein, zeta polypeptide |
| 1438992_x_at | 1.04  | 1.15   | 1.45   | 1.57    | 1.58 | <a href="#">Atf4</a>    | activating transcription factor 4                                                        |

Supplemental Table 6. Genes down-regulated in at least 1 rosiglitazone treatment group and changed (up or down) in mice containing a dominant negative PPAR gamma. Red or green represents statistically significant up- or down- regulation, respectively.

| ProbeSet     | low2d       | low14d      | high2d      | high14d     | gdn         | gene                          | description                                                                        |
|--------------|-------------|-------------|-------------|-------------|-------------|-------------------------------|------------------------------------------------------------------------------------|
| 1448792_a_at | <b>0.62</b> | <b>0.38</b> | <b>0.32</b> | <b>0.39</b> | <b>3.97</b> | <a href="#">Cyp2f2</a>        | cytochrome P450, family 2, subfamily f, polypeptide 2                              |
| 1440837_at   | 0.90        | 0.89        | 0.91        | <b>0.70</b> | <b>1.64</b> | <a href="#">H2-Ob</a>         | histocompatibility 2, O region beta locus                                          |
| 1420650_at   | 0.77        | <b>0.73</b> | 0.82        | 0.96        | <b>1.59</b> | <a href="#">Atbf1</a>         | AT motif binding factor 1                                                          |
| 1429702_at   | <b>0.62</b> | 0.67        | 0.78        | 0.70        | <b>1.56</b> | <a href="#">2900072G11Rik</a> | RIKEN cDNA 2900072G11 gene                                                         |
| 1450241_a_at | <b>0.78</b> | 0.92        | 0.79        | 0.83        | <b>1.50</b> | <a href="#">Evi2a</a>         | ecotropic viral integration site 2a                                                |
| 1418872_at   | <b>0.71</b> | <b>0.64</b> | <b>0.70</b> | 0.89        | <b>1.45</b> | <a href="#">Abcb1b</a>        | ATP-binding cassette, sub-family B (MDR/TAP), member 1B                            |
| 1419609_at   | 0.80        | 0.82        | <b>0.74</b> | <b>0.72</b> | <b>1.45</b> | <a href="#">Ccr1</a>          | chemokine (C-C motif) receptor 1                                                   |
| 1441370_at   | <b>0.64</b> | 0.72        | 0.82        | 0.95        | <b>1.45</b> | <a href="#">Nfkbiz</a>        | Nuclear factor of kappa light polypeptide gene enhancer in B-cells inhibitor, zeta |
| 1456377_x_at | <b>0.69</b> | <b>0.68</b> | <b>0.58</b> | <b>0.75</b> | <b>1.44</b> | <a href="#">LOC632329</a>     | similar to epithelial protein lost in neoplasm                                     |
| 1455318_at   | 0.84        | 0.80        | <b>0.72</b> | 0.81        | <b>1.41</b> | <a href="#">Timd4</a>         | T-cell immunoglobulin and mucin domain containing 4                                |
| 1428447_at   | 0.77        | <b>0.74</b> | 0.90        | 0.81        | <b>1.41</b> | <a href="#">Tmem14a</a>       | transmembrane protein 14A                                                          |
| 1417045_at   | 0.83        | <b>0.77</b> | <b>0.63</b> | <b>0.61</b> | <b>1.40</b> | <a href="#">Bid</a>           | BH3 interacting domain death agonist                                               |
| 1438427_at   | 0.82        | <b>0.72</b> | <b>0.77</b> | <b>0.73</b> | <b>1.39</b> | <a href="#">4932442K08Rik</a> | RIKEN cDNA 4932442K08 gene                                                         |
| 1451335_at   | <b>0.68</b> | <b>0.68</b> | <b>0.61</b> | 0.75        | <b>1.38</b> | <a href="#">Plac8</a>         | placenta-specific 8                                                                |
| 1438592_at   | 0.87        | 0.97        | <b>0.81</b> | 0.83        | <b>1.38</b> | <a href="#">Nek1</a>          | NIMA (never in mitosis gene a)-related expressed kinase 1                          |
| 1435504_at   | 0.83        | <b>0.72</b> | 0.89        | 0.86        | <b>1.37</b> | <a href="#">Rsnl2</a>         | Transcribed locus                                                                  |



Supplemental Table 6. Genes down-regulated in at least 1 rosiglitazone treatment group and changed (up or down) in mice containing a dominant negative PPAR gamma. Red or green represents statistically significant up- or down- regulation, respectively.

| ProbeSet     | low2d       | low14d      | high2d      | high14d     | gdn         | gene                          | description                                                                    |
|--------------|-------------|-------------|-------------|-------------|-------------|-------------------------------|--------------------------------------------------------------------------------|
| 1438750_at   | <b>0.73</b> | 0.87        | 0.84        | 0.79        | <b>1.36</b> | <a href="#">Atrx</a>          | Alpha thalassemia/mental retardation syndrome X-linked homolog (human)         |
| 1442576_at   | <b>0.79</b> | 0.84        | 0.85        | 0.93        | <b>1.36</b> | <a href="#">Creb5</a>         | CAMP responsive element binding protein 5                                      |
| 1427183_at   | <b>0.72</b> | <b>0.65</b> | <b>0.71</b> | 0.89        | <b>1.33</b> | <a href="#">Efemp1</a>        | epidermal growth factor-containing fibulin-like extracellular matrix protein 1 |
| 1457445_at   | <b>0.78</b> | 0.95        | 0.99        | 0.89        | <b>1.33</b> | <a href="#">Trps1</a>         | trichorhinophalangeal syndrome I (human)                                       |
| 1460465_at   | <b>0.74</b> | <b>0.73</b> | 0.80        | 0.95        | <b>1.32</b> | <a href="#">A930038C07Rik</a> | RIKEN cDNA A930038C07 gene                                                     |
| 1430038_at   | 0.90        | <b>0.79</b> | <b>0.80</b> | <b>0.77</b> | <b>1.32</b> | <a href="#">Gphn</a>          | gephyrin                                                                       |
| 1451716_at   | 0.87        | <b>0.80</b> | <b>0.80</b> | 0.84        | <b>1.32</b> | <a href="#">Mafb</a>          | v-maf musculoaponeurotic fibrosarcoma oncogene family, protein B (avian)       |
| 1416296_at   | 0.89        | <b>0.79</b> | <b>0.73</b> | 0.91        | <b>1.32</b> | <a href="#">Il2rg</a>         | interleukin 2 receptor, gamma chain                                            |
| 1437414_at   | <b>0.76</b> | <b>0.71</b> | 0.84        | 0.79        | <b>1.31</b> | <a href="#">Zfp217</a>        | zinc finger protein 217                                                        |
| 1422744_at   | <b>0.77</b> | <b>0.74</b> | 0.87        | <b>0.78</b> | <b>1.31</b> | <a href="#">Phka1</a>         | phosphorylase kinase alpha 1                                                   |
| 1437410_at   | <b>0.68</b> | <b>0.75</b> | 0.82        | 0.89        | <b>1.30</b> | <a href="#">Aldh2</a>         | aldehyde dehydrogenase 2, mitochondrial                                        |
| 1424965_at   | <b>0.68</b> | <b>0.71</b> | <b>0.61</b> | <b>0.53</b> | <b>1.29</b> | <a href="#">Lpxn</a>          | leupaxin                                                                       |
| 1455224_at   | <b>0.70</b> | <b>0.59</b> | <b>0.72</b> | <b>0.68</b> | <b>1.28</b> | <a href="#">Angptl1</a>       | angiopoietin-like 1                                                            |
| 1434401_at   | <b>0.79</b> | <b>0.80</b> | 0.85        | 0.91        | <b>1.25</b> | <a href="#">Zcchc2</a>        | zinc finger, CCHC domain containing 2                                          |
| 1431751_a_at | 0.99        | 0.84        | <b>0.82</b> | 0.84        | <b>1.25</b> | <a href="#">Mpped2</a>        | metallophosphoesterase domain containing 2                                     |
| 1436312_at   | 0.95        | 0.84        | <b>0.79</b> | <b>0.79</b> | <b>1.24</b> | <a href="#">Ikzf1</a>         | IKAROS family zinc finger 1                                                    |

Supplemental Table 6. Genes down-regulated in at least 1 rosiglitazone treatment group and changed (up or down) in mice containing a dominant negative PPAR gamma. Red or green represents statistically significant up- or down- regulation, respectively.

| ProbeSet     | low2d       | low14d      | high2d      | high14d     | gdn         | gene                          | description                                                                                                                                                                                          |
|--------------|-------------|-------------|-------------|-------------|-------------|-------------------------------|------------------------------------------------------------------------------------------------------------------------------------------------------------------------------------------------------|
| 1460391_at   | 0.95        | <b>0.83</b> | 0.86        | <b>0.78</b> | <b>1.24</b> | <a href="#">Gtpbp9</a>        | GTP-binding protein 9 (putative)                                                                                                                                                                     |
| 1446834_at   | 0.88        | 0.98        | <b>0.83</b> | <b>0.74</b> | <b>1.24</b> | <a href="#">Ctsc</a>          | Cathepsin C                                                                                                                                                                                          |
| 1450629_at   | <b>0.82</b> | 0.84        | <b>0.78</b> | <b>0.81</b> | <b>1.19</b> | <a href="#">Lima1</a>         | LIM domain and actin binding 1                                                                                                                                                                       |
| 1421646_a_at | 0.97        | 0.88        | <b>0.86</b> | <b>0.82</b> | <b>0.86</b> | <a href="#">Pias3</a>         | protein inhibitor of activated STAT 3                                                                                                                                                                |
| 1419617_at   | 0.94        | 0.94        | <b>0.83</b> | 0.85        | <b>0.84</b> | <a href="#">Kcnn1</a>         | potassium intermediate/small conductance calcium-activated channel, subfamily N, member 1                                                                                                            |
| 1448662_at   | 0.87        | 0.90        | <b>0.82</b> | 0.81        | <b>0.83</b> | <a href="#">Fzd6</a>          | frizzled homolog 6 (Drosophila)                                                                                                                                                                      |
| 1431214_at   | 0.85        | <b>0.68</b> | <b>0.66</b> | <b>0.65</b> | <b>0.82</b> | <a href="#">1300007C21Rik</a> | RIKEN cDNA 1300007C21 gene                                                                                                                                                                           |
| 1426710_at   | 0.90        | <b>0.79</b> | <b>0.59</b> | <b>0.63</b> | <b>0.82</b> | <a href="#">Calm3</a>         | calmodulin 3                                                                                                                                                                                         |
| 1416493_at   | 0.90        | <b>0.82</b> | <b>0.66</b> | <b>0.72</b> | <b>0.82</b> | <a href="#">Ddost</a>         | dolichyl-di-phosphooligosaccharide-protein glycotransferase                                                                                                                                          |
| 1452581_at   | 0.92        | 0.84        | <b>0.77</b> | 0.82        | <b>0.82</b> | <a href="#">2610304G08Rik</a> | RIKEN cDNA 2610304G08 gene                                                                                                                                                                           |
| 1422329_a_at | 0.98        | 0.87        | <b>0.78</b> | <b>0.76</b> | <b>0.82</b> | <a href="#">Ntrk3</a>         | neurotrophic tyrosine kinase, receptor, type 3                                                                                                                                                       |
| 1460413_s_at | 0.98        | <b>0.84</b> | <b>0.84</b> | <b>0.83</b> | <b>0.82</b> | <a href="#">Zdhc1</a>         | zinc finger, DHHC domain containing 1                                                                                                                                                                |
| 1435560_at   | 0.93        | <b>0.77</b> | <b>0.74</b> | <b>0.72</b> | <b>0.81</b> | <a href="#">LOC671163</a>     | similar to integrin alpha-L precursor (Leukocyte adhesion glycoprotein LFA-1 alpha chain) (LFA-1A) (Leukocyte function-associated molecule 1 alpha chain) (Lymphocyte antigen Ly-15) (CD11a antigen) |
| 1421042_at   | 0.93        | <b>0.81</b> | <b>0.67</b> | <b>0.78</b> | <b>0.81</b> | <a href="#">Arhgef2</a>       | rho/rac guanine nucleotide exchange factor (GEF) 2                                                                                                                                                   |
| 1452376_at   | 0.98        | 0.90        | <b>0.74</b> | <b>0.67</b> | <b>0.81</b> | <a href="#">Zfp444</a>        | zinc finger protein 444                                                                                                                                                                              |
| 1416497_at   | 0.83        | <b>0.75</b> | <b>0.66</b> | <b>0.69</b> | <b>0.80</b> | <a href="#">Pdia4</a>         | protein disulfide isomerase associated 4                                                                                                                                                             |

Supplemental Table 6. Genes down-regulated in at least 1 rosiglitazone treatment group and changed (up or down) in mice containing a dominant negative PPAR gamma. Red or green represents statistically significant up- or down- regulation, respectively.

| ProbeSet     | low2d       | low14d      | high2d      | high14d     | gdn         | gene                          | description                                          |
|--------------|-------------|-------------|-------------|-------------|-------------|-------------------------------|------------------------------------------------------|
| 1450409_a_at | 0.97        | <b>0.81</b> | <b>0.75</b> | <b>0.69</b> | <b>0.80</b> | <a href="#">4930570C03Rik</a> | RIKEN cDNA 4930570C03 gene                           |
| 1426738_at   | 0.99        | 0.86        | <b>0.74</b> | <b>0.72</b> | <b>0.80</b> | <a href="#">Dgkz</a>          | diacylglycerol kinase zeta                           |
| 1460305_at   | 0.97        | 0.89        | <b>0.79</b> | <b>0.72</b> | <b>0.80</b> | <a href="#">Itga3</a>         | integrin alpha 3                                     |
| 1421026_at   | 0.81        | <b>0.73</b> | <b>0.57</b> | <b>0.63</b> | <b>0.79</b> | <a href="#">Gna12</a>         | guanine nucleotide binding protein, alpha 12         |
| 1450378_at   | 0.87        | <b>0.77</b> | <b>0.61</b> | <b>0.66</b> | <b>0.79</b> | <a href="#">Tapbp</a>         | TAP binding protein                                  |
| 1416322_at   | 0.87        | <b>0.75</b> | <b>0.66</b> | <b>0.64</b> | <b>0.79</b> | <a href="#">Prelp</a>         | proline arginine-rich end leucine-rich repeat        |
| 1453960_a_at | 0.88        | <b>0.78</b> | <b>0.63</b> | <b>0.64</b> | <b>0.79</b> | <a href="#">Capzb</a>         | capping protein (actin filament) muscle Z-line, beta |
| 1421044_at   | 0.85        | <b>0.80</b> | <b>0.72</b> | <b>0.57</b> | <b>0.79</b> | <a href="#">Mrc2</a>          | mannose receptor, C type 2                           |
| 1417949_at   | 0.84        | <b>0.78</b> | <b>0.73</b> | <b>0.65</b> | <b>0.79</b> | <a href="#">Ilf2</a>          | interleukin enhancer binding factor 2                |
| 1426379_at   | 0.97        | 0.84        | <b>0.76</b> | 0.82        | <b>0.79</b> | <a href="#">Eif4b</a>         | eukaryotic translation initiation factor 4B          |
| 1452024_a_at | 0.99        | 0.89        | <b>0.73</b> | 0.80        | <b>0.79</b> | <a href="#">Ldb1</a>          | LIM domain binding 1                                 |
| 1428850_x_at | 0.89        | <b>0.70</b> | <b>0.56</b> | <b>0.63</b> | <b>0.78</b> | <a href="#">Cd99</a>          | CD99 antigen                                         |
| 1416038_at   | 0.87        | <b>0.72</b> | <b>0.65</b> | <b>0.60</b> | <b>0.78</b> | <a href="#">AL033314</a>      | expressed sequence AL033314                          |
| 1450097_s_at | 0.91        | <b>0.76</b> | <b>0.66</b> | <b>0.67</b> | <b>0.78</b> | <a href="#">Gna12</a>         | guanine nucleotide binding protein, alpha 12         |
| 1450325_at   | 0.92        | <b>0.78</b> | <b>0.70</b> | <b>0.73</b> | <b>0.78</b> | <a href="#">Angpt4</a>        | angiopoietin 4                                       |
| 1450038_s_at | <b>0.79</b> | <b>0.79</b> | 0.81        | 0.80        | <b>0.78</b> | <a href="#">Usp9x</a>         | ubiquitin specific peptidase 9, X chromosome         |

Supplemental Table 6. Genes down-regulated in at least 1 rosiglitazone treatment group and changed (up or down) in mice containing a dominant negative PPAR gamma. Red or green represents statistically significant up- or down- regulation, respectively.

| ProbeSet     | low2d | low14d      | high2d      | high14d     | gdn         | gene                       | description                                                                                                   |
|--------------|-------|-------------|-------------|-------------|-------------|----------------------------|---------------------------------------------------------------------------------------------------------------|
| 1421276_a_at | 0.85  | 0.86        | <b>0.75</b> | <b>0.74</b> | <b>0.78</b> | <a href="#">Dst</a>        | dystonin                                                                                                      |
| 1417015_at   | 0.88  | 0.92        | <b>0.71</b> | <b>0.71</b> | <b>0.78</b> | <a href="#">Rassf3</a>     | Ras association (RalGDS/AF-6) domain family 3                                                                 |
| 1418082_at   | 0.96  | 0.84        | 0.91        | <b>0.67</b> | <b>0.78</b> | <a href="#">Nmt1</a>       | N-myristoyltransferase 1                                                                                      |
| 1434370_s_at | 0.99  | <b>0.82</b> | <b>0.79</b> | <b>0.81</b> | <b>0.78</b> | <a href="#">Faf1</a>       | Fas-associated factor 1                                                                                       |
| 1421860_at   | 0.88  | <b>0.74</b> | <b>0.65</b> | <b>0.63</b> | <b>0.77</b> | <a href="#">Clstn1</a>     | calsyntenin 1                                                                                                 |
| 1453622_s_at | 0.83  | <b>0.77</b> | <b>0.76</b> | <b>0.74</b> | <b>0.77</b> | <a href="#">Mllt3</a>      | myeloid/lymphoid or mixed lineage-leukemia translocation to 3 homolog (Drosophila)                            |
| 1422622_at   | 0.93  | 0.77        | <b>0.77</b> | 0.82        | <b>0.77</b> | <a href="#">Nos3</a>       | nitric oxide synthase 3, endothelial cell                                                                     |
| 1427797_s_at | 0.86  | <b>0.73</b> | <b>0.68</b> | <b>0.65</b> | <b>0.76</b> | <a href="#">EG622147</a>   | hypothetical protein LOC670510                                                                                |
| 1416732_at   | 0.79  | 0.87        | 0.79        | <b>0.69</b> | <b>0.76</b> | <a href="#">Top2b</a>      | topoisomerase (DNA) II beta                                                                                   |
| 1451678_at   | 0.99  | 0.95        | <b>0.77</b> | 0.85        | <b>0.76</b> | <a href="#">Narf</a>       | nuclear prelamin A recognition factor                                                                         |
| 1449018_at   | 0.80  | <b>0.67</b> | <b>0.46</b> | <b>0.54</b> | <b>0.75</b> | <a href="#">Pfn1</a>       | profilin 1                                                                                                    |
| 1423554_at   | 0.90  | <b>0.72</b> | <b>0.63</b> | <b>0.66</b> | <b>0.75</b> | <a href="#">Ggcx</a>       | gamma-glutamyl carboxylase                                                                                    |
| 1418075_at   | 0.96  | 0.78        | <b>0.60</b> | <b>0.65</b> | <b>0.75</b> | <a href="#">St6galnac4</a> | ST6 (alpha-N-acetyl-neuraminyl-2,3-beta-galactosyl-1,3)-N-acetylgalactosaminide alpha-2,6-sialyltransferase 4 |
| 1419099_x_at | 0.99  | 0.85        | <b>0.66</b> | <b>0.68</b> | <b>0.75</b> | <a href="#">Stom</a>       | stomatin                                                                                                      |
| 1433744_at   | 0.83  | 0.88        | 0.93        | <b>0.76</b> | <b>0.75</b> | <a href="#">Lrtm2</a>      | leucine-rich repeats and transmembrane domains 2                                                              |
| 1422044_at   | 0.87  | 0.92        | <b>0.77</b> | 0.84        | <b>0.75</b> | <a href="#">Ndst1</a>      | N-deacetylase/N-sulfotransferase (heparan glucosaminyl) 1                                                     |

Supplemental Table 6. Genes down-regulated in at least 1 rosiglitazone treatment group and changed (up or down) in mice containing a dominant negative PPAR gamma. Red or green represents statistically significant up- or down- regulation, respectively.

| ProbeSet     | low2d | low14d      | high2d      | high14d     | gdn         | gene                    | description                                                                  |
|--------------|-------|-------------|-------------|-------------|-------------|-------------------------|------------------------------------------------------------------------------|
| 1421721_a_at | 0.93  | 0.97        | <b>0.75</b> | 0.83        | <b>0.75</b> | <a href="#">Arnt</a>    | aryl hydrocarbon receptor nuclear translocator                               |
| 1432344_a_at | 0.88  | <b>0.67</b> | <b>0.59</b> | <b>0.61</b> | <b>0.74</b> | <a href="#">Aplp2</a>   | amyloid beta (A4) precursor-like protein 2                                   |
| 1451734_a_at | 0.92  | 0.78        | <b>0.67</b> | 0.77        | <b>0.74</b> | <a href="#">Dbn1</a>    | drebrin 1                                                                    |
| 1451737_at   | 0.89  | 0.83        | <b>0.74</b> | <b>0.68</b> | <b>0.74</b> | <a href="#">Pik3r1</a>  | phosphatidylinositol 3-kinase, regulatory subunit, polypeptide 1 (p85 alpha) |
| 1432211_a_at | 0.91  | 0.81        | <b>0.71</b> | <b>0.74</b> | <b>0.74</b> | <a href="#">Fbxo9</a>   | f-box protein 9                                                              |
| 1425344_at   | 0.89  | <b>0.76</b> | 0.78        | 0.75        | <b>0.74</b> | <a href="#">Narf</a>    | nuclear prelamin A recognition factor                                        |
| 1426458_at   | 0.83  | <b>0.72</b> | 0.85        | 0.78        | <b>0.74</b> | <a href="#">Slmap</a>   | sarcolemma associated protein                                                |
| 1422845_at   | 0.81  | <b>0.74</b> | <b>0.65</b> | <b>0.69</b> | <b>0.73</b> | <a href="#">Canx</a>    | calnexin                                                                     |
| 1453931_at   | 0.93  | <b>0.80</b> | <b>0.76</b> | <b>0.74</b> | <b>0.73</b> | <a href="#">Col14a1</a> | procollagen, type XIV, alpha 1                                               |
| 1443805_at   | 0.80  | <b>0.71</b> | <b>0.59</b> | <b>0.61</b> | <b>0.72</b> | <a href="#">Dact3</a>   | dapper homolog 3, antagonist of beta-catenin (xenopus)                       |
| 1430514_a_at | 0.88  | <b>0.71</b> | <b>0.53</b> | <b>0.63</b> | <b>0.72</b> | <a href="#">Cd99</a>    | CD99 antigen                                                                 |
| 1421245_at   | 0.95  | 0.87        | <b>0.61</b> | <b>0.70</b> | <b>0.71</b> | <a href="#">Sost</a>    | sclerostin                                                                   |
| 1422987_at   | 0.94  | <b>0.71</b> | <b>0.77</b> | <b>0.71</b> | <b>0.68</b> | <a href="#">Ntn1</a>    | netrin 1                                                                     |
| 1425285_a_at | 0.91  | 0.85        | <b>0.75</b> | <b>0.78</b> | <b>0.67</b> | <a href="#">Rab27a</a>  | RAB27A, member RAS oncogene family                                           |
| 1421431_at   | 0.89  | 0.74        | <b>0.61</b> | <b>0.55</b> | <b>0.55</b> | <a href="#">Ptrf</a>    | polymerase I and transcript release factor                                   |

Supplemental Table 7. Number of genes that were differentially expressed in both rosiglitazone-treated and G-DN mice. NS = non-significant change.

| <b>Up with rosiglitazone<br/>(# significant changes)</b>   | <b>total genes</b> | <b>gdn-down</b> | <b>gdn-up</b> | <b>gdn-ns</b> |
|------------------------------------------------------------|--------------------|-----------------|---------------|---------------|
| 1                                                          | 410                | 44              | 14            | 352           |
| 2                                                          | 180                | 24              | 5             | 151           |
| 3                                                          | 75                 | 16              | 0             | 59            |
| 4                                                          | 33                 | 10              | 0             | 23            |
|                                                            |                    |                 |               |               |
| <b>Down with rosiglitazone<br/>(# significant changes)</b> | <b>total genes</b> | <b>gdn-down</b> | <b>gdn-up</b> | <b>gdn-ns</b> |
| 1                                                          | 1040               | 60              | 35            | 945           |
| 2                                                          | 588                | 45              | 22            | 521           |
| 3                                                          | 255                | 30              | 12            | 213           |
| 4                                                          | 32                 | 0               | 4             | 28            |

Supplemental Table 8. G-DN specific changes in expression of genes involved in oxidoreductase activity or transcriptional regulation. Red or green represents statistically significant up- or down- regulation, respectively.

| ProbeSetID                          | low2d | low14d | high2d | high14d | g-dn | Gene    | GeneID | Description                                            |
|-------------------------------------|-------|--------|--------|---------|------|---------|--------|--------------------------------------------------------|
| Oxidoreductase Activity; GO:0016491 |       |        |        |         |      |         |        |                                                        |
| 1417651_at                          | 0.94  | 0.88   | 1.07   | 1.04    | 0.57 | Cyp2c29 | 13095  | cytochrome P450, family 2, subfamily c, polypeptide 29 |
| 1424618_at                          | 1.07  | 1.09   | 1.02   | 1.02    | 0.64 | Hpd     | 15445  | 4-hydroxyphenylpyruvic acid dioxygenase                |
| 1441271_at                          | 1.14  | 1.07   | 0.92   | 0.97    | 0.66 | Idh3b   | 170718 | Isocitrate dehydrogenase 3 (NAD+) beta                 |
| 1418506_a_at                        | 1.16  | 1.00   | 0.94   | 0.93    | 0.69 | Prdx2   | 21672  | peroxiredoxin 2                                        |
| 1450715_at                          | 1.06  | 0.93   | 1.08   | 1.19    | 0.69 | Cyp1a2  | 13077  | cytochrome P450, family 1, subfamily a, polypeptide 2  |
| 1451386_at                          | 1.09  | 0.90   | 0.82   | 0.86    | 0.72 | Blvrb   | 233016 | biliverdin reductase B (flavin reductase (NADPH))      |
| 1448800_at                          | 1.24  | 1.12   | 1.02   | 1.01    | 0.72 | Rtn4ip1 | 170728 | reticulon 4 interacting protein 1                      |
| 1429972_s_at                        | 1.24  | 0.99   | 0.92   | 0.95    | 0.73 | Txnrd2  | 26462  | thioredoxin reductase 2                                |
| 1418113_at                          | 0.96  | 0.95   | 0.90   | 0.90    | 0.75 | Cyp2d10 | 13101  | cytochrome P450, family 2, subfamily d, polypeptide 10 |

Supplemental Table 8. G-DN specific changes in expression of genes involved in oxidoreductase activity or transcriptional regulation. Red or green represents statistically significant up- or down- regulation, respectively.

| ProbeSetID                                             | low2d | low14d | high2d | high14d | g-dn | Gene      | GeneID | Description                                                  |
|--------------------------------------------------------|-------|--------|--------|---------|------|-----------|--------|--------------------------------------------------------------|
| Regulation of transcription, DNA-dependent; GO:0006355 |       |        |        |         |      |           |        |                                                              |
| 1419913_at                                             | 0.87  | 1.00   | 1.09   | 1.23    | 1.83 | Strap     | 20901  | Serine/threonine kinase receptor associated protein          |
| 1460407_at                                             | 1.08  | 0.87   | 0.91   | 0.90    | 1.75 | Spib      | 272382 | Spi-B transcription factor (Spi-1/PU.1 related)              |
| 1446148_x_at                                           | 0.83  | 1.01   | 0.98   | 1.10    | 1.59 | C79248    | 96982  | expressed sequence C79248                                    |
| 1421564_at                                             | 1.24  | 0.88   | 0.80   | 0.75    | 1.50 | Serpina3c | 16625  | serine (or cysteine) peptidase inhibitor, clade A, member 3C |
| 1444229_at                                             | 0.84  | 0.93   | 0.99   | 1.05    | 1.50 | Nr2f2     | 11819  | nuclear receptor subfamily 2, group F, member 2              |
| 1449661_at                                             | 0.91  | 1.05   | 1.04   | 0.97    | 1.46 | Suz12     | 52615  | Suppressor of zeste 12 homolog (Drosophila)                  |
| 1456916_at                                             | 0.94  | 0.95   | 1.05   | 0.99    | 1.42 | Nsd1      | 18193  | Nuclear receptor-binding SET-domain protein 1                |
| 1433512_at                                             | 0.89  | 0.91   | 1.07   | 1.28    | 1.40 | Fli1      | 14247  | Friend leukemia integration 1                                |
| 1435337_at                                             | 0.86  | 0.98   | 1.04   | 1.15    | 1.36 | Tshz3     | 243931 | teashirt zinc finger family member 3                         |
| 1420615_at                                             | 0.91  | 0.89   | 0.95   | 1.07    | 1.33 | Ash2l     | 23808  | ash2 (absent, small, or homeotic)-like (Drosophila)          |
| 1453267_at                                             | 0.84  | 0.95   | 1.04   | 1.05    | 1.31 | Atbf1     | 11906  | AT motif binding factor 1                                    |
| 1460491_at                                             | 0.89  | 0.86   | 0.99   | 0.88    | 1.27 | Invs      | 16348  | inversin                                                     |
| 1436392_s_at                                           | 0.96  | 0.99   | 1.09   | 1.09    | 1.27 | Tcfap2c   | 21420  | transcription factor AP-2, gamma                             |
| 1446405_at                                             | 0.95  | 1.09   | 1.17   | 1.11    | 1.21 | Myst3     | 244349 | MYST histone acetyltransferase (monocytic leukemia) 3        |
